# Supplementary material
Source: PubMed Central journal article supplement (PMC4382239)

## Supplemental Data

### Defective removal of ribonucleotides from DNA promotes systemic autoimmunity

Claudia Günther<sup>1#</sup>, Barbara Kind<sup>2#</sup>, Martin A.M. Reijns<sup>3#</sup>, Nicole Berndt<sup>1</sup>, Manuel Martinez-Bueno<sup>4</sup>, Christine Wolf<sup>2</sup>, Victoria Tüngler<sup>2</sup>, Osvaldo Chara<sup>5,6</sup>, Young Ae Lee<sup>7</sup>, Norbert Hübner<sup>7</sup>, Louise Bicknell<sup>3</sup>, Sophia Blum<sup>2</sup>, Claudia Krug<sup>2</sup>, Franziska Schmidt<sup>2</sup>, Stefanie Kretschmer<sup>2</sup>, Sarah Koss<sup>2</sup>, Katy R. Astell<sup>3</sup>, Georgia Ramantani<sup>8</sup>, Anja Bauerfeind<sup>7</sup>, David L. Morris<sup>9</sup>, Deborah S. Cunninghame Graham<sup>9</sup>, Doryen Bubeck<sup>10</sup>, Andrea Leitch<sup>3</sup>, Stuart H. Ralston<sup>11</sup>, Elizabeth A. Blackburn<sup>12</sup>, Manfred Gahr<sup>2</sup>, Torsten Witte<sup>13</sup>, Timothy J. Vyse<sup>9</sup>, Inga Melchers<sup>14</sup>, Elisabeth Mangold<sup>15,16</sup>, Markus M. Nöthen<sup>15,16,17</sup>, Martin Aringer<sup>18</sup>, Annegret Kuhn<sup>19</sup>, Kirsten Lüthke<sup>20</sup>, Leonore Unger<sup>21</sup>, Annette Bley<sup>22</sup>, Alice Lorenzi<sup>23</sup>, John D. Isaacs<sup>23</sup>, Dimitra Alexopoulou<sup>24</sup>, Karsten Conrad<sup>25</sup>, Andreas Dahl<sup>24</sup>, Axel Roers<sup>25</sup>, Marta E. Alarcon-Riquelme<sup>4,26</sup>, Andrew P. Jackson<sup>3</sup>, Min Ae Lee-Kirsch<sup>2§</sup>

<sup>1</sup> Department of Dermatology, Medizinische Fakultät Carl Gustav Carus, Technische Universität Dresden, Dresden, Germany

<sup>2</sup> Department of Pediatrics, Medizinische Fakultät Carl Gustav Carus, Technische Universität Dresden, Dresden, Germany

<sup>3</sup> Medical Research Council Human Genetics Unit, MRC Institute of Genetics and Molecular Medicine, University of Edinburgh, Edinburgh, UK

<sup>4</sup> Centro de Genómica e Investigación Oncológica Pfizer-Universidad de Granada-Junta de Andalucía (GENYO), Granada, Spain

<sup>5</sup> Center for Information Services and High Performance Computing, Technical University Dresden, Dresden, Germany

<sup>6</sup> Institute of Physics of Liquids and Biological Systems, National University of La Plata, La Plata, Argentina

<sup>7</sup> Max Delbrück Centre for Molecular Medicine, Berlin-Buch, Germany

<sup>8</sup> Epilepsy Center, University of Freiburg, Freiburg, Germany

<sup>9</sup> Genetics & Molecular Medicine, King's College London, London, UK

<sup>10</sup> Department of Life Sciences, Imperial College London, London, UK

<sup>11</sup> Rheumatic Diseases Unit, Centre for Genomic & Experimental Medicine, MRC Institute of Genetics and Molecular Medicine, University of Edinburgh, Edinburgh, UK

<sup>12</sup> Centre for Translational and Chemical Biology, School of Biological Sciences, University of Edinburgh, Edinburgh, UK

<sup>13</sup> Hannover Medical School, Clinical Immunology, Hannover, Germany

<sup>14</sup> Clinical Research Unit for Rheumatology, University Medical Center, Freiburg, Germany

<sup>15</sup> Institute of Human Genetics, University of Bonn, Bonn, Germany

<sup>16</sup> German Center for Neurodegenerative Diseases (DZNE)

<sup>17</sup> Department of Genomics, Life & Brain Center, University of Bonn, Bonn, Germany

<sup>18</sup> Rheumatology, Department of Internal Medicine III, Medizinische Fakultät Carl Gustav Carus, Technische Universität Dresden, Dresden, Germany

<sup>19</sup> Department of Dermatology, University Hospital, University of Münster, Münster, Germany

<sup>20</sup> Schwerpunktpraxis Rheumatologie, Dresden, Germany

<sup>21</sup> Städtisches Klinikum Dresden-Friedrichstadt, Dresden, Germany

<sup>22</sup> Department of Pediatrics, University of Hamburg, Germany

<sup>23</sup> Institute of Cellular Medicine, Newcastle University, Newcastle upon Tyne, UK

<sup>24</sup> Center for Regenerative Therapies Dresden, DFG Cluster of Excellence, Technical University Dresden, Dresden, Germany

<sup>25</sup> Institute for Immunology, Medizinische Fakultät Carl Gustav Carus, Technische Universität Dresden, Dresden, Germany

<sup>26</sup> Arthritis and Clinical Immunology Program, Oklahoma Medical Research Foundation, Oklahoma City, USA

The authors declare no conflict of interests.

# Equal contribution

§ Correspondence to Min Ae lee-Kirsch, Department of Pediatrics, Medizinische Fakultät Carl Gustav Carus, Technische Universität Dresden, Fetscherstr. 74, 01307 Dresden, Germany; phone: 0049-351-458 6887; email address: minae.lee-kirsch@uniklinikum-dresden.de.

## Supplemental Methods

**Sample collection used for replication of association.** We used previously genotyped GWAS data from 5,478 individuals of European ancestry including 4,254 SLE patients and 1,224 controls genotyped using the Illumina HumanOmni1\_Quad\_v1-0\_B chip and out-of-study controls obtained from three GWAS studies available at dbGaP with the appropriate approvals. . In order to obtain a quality-controlled working dataset satisfying current state-of-the-art criteria for association studies, data filtering was conducted using PLINK v1.07 1 (1) applying the following criteria: minimum total call rate per sample of 90%, minimum call rate per marker of 98%, minor allele frequency (MAF) threshold of 0.01%, Hardy-Weinberg Equilibrium (HWE) p-value for cases and controls at a minimum of 0.0001, and in addition at 0.01 only for controls, and finally a cutoff p-value of 0.00001 for differential missingness in no-call genotypes between cases and controls. To correct for stratification, principal component analysis was performed with smartpca, EIGENSOFT 4.0beta package 2 (2). This resulted in a  $\lambda_{GC} = 1.05$  using the first 10 principal components. The final data set used for association analysis consisted of 4212 cases and 4065 controls.

**Imputation and association analysis.** Markers within the region of the three RNASEH2 genes (*RNASEH2A*, chr19:12804303-12813648; *RNASEH2B*, chr13:50909678-50970460; *RNASEH2C* chr11: 65717673-65720938; human genome assembly GRCh38) were selected for imputation with IMPUTE2 using the GWAS data of set 2 and the 1000 Genomes Project as reference (3). Prior to that, the three GWAS data sets obtained from the dbGaP database were pre-imputed with SHAPEIT using only EUR subpopulations as reference (4). For imputation, a restrictive QC-filter was applied (SNP genotyping rate  $\geq 99\%$ , sample genotyping rate  $\geq 98\%$ ) without restriction of allele frequencies in order to include rare and low frequency variants. To ensure a high degree of reliable imputation, a conservative IMPUTE info\_value threshold of  $> 0.8$  for each marker was applied for association analysis at various minor allele frequency thresholds ( $<0.05$ ,  $<0.01$ ,  $<0.005$ ,  $<0.001$ ). To account for linkage disequilibrium and to avoid

the possible effect of redundancy, association was also tested including only markers with an `info_value` of  $> 0.8$  and an `LE r2`  $< 0.5$ . Permutation was conducted to correct for multiple testing. Association was tested for each individual subunit and in an aggregate analysis assuming that all subunits form a single biochemical entity using the rare variant weighted aggregated statistic RWAS & LRT version 0.5 (5).

**Comet assay.** Comet assays were performed using a modified version of the method described by Olive et al. (6). Frosted microscope slides (Fisher Scientific) were pre-coated with melted 0.5% agarose (type II, Sigma) in PBS followed by 1% agarose (type II, Sigma).  $1.5 \times 10^5$  cells synchronized by 24 h serum starvation were suspended in 150  $\mu$ l 1% low-melting point agarose (type VII, Sigma) melted in PBS at 50 °C and dispersed on pre-warmed pre-coated slides. After gelling, slides were incubated in alkaline solution (2.5 M NaCl, 0.1 M EDTA, 10 mM Tris, 1% Triton X-100, pH 10) at 4 °C for 16-18 h. Slides were then washed 10 times for 10 min in PBS. For RNase H2 digestion, slides lysed in neutral lysis buffer were equilibrated 3 times for 20 min in RNase H2 reaction buffer (20 mM Tris-HCl, 10 mM (NH<sub>4</sub>)<sub>2</sub>SO<sub>4</sub>, 10 mM KCl, 2 mM MgSO<sub>4</sub>, 0.1% Triton X-100, pH 8.8). RNase H2 (New England Biolabs; 50 U per slide for murine cells, 100 U per slide for human cells) was then added in 50  $\mu$ l of buffer, and slides were incubated for 16 h at 37 °C. Reactions were stopped by washing in 0.1% SDS in PBS for 10 min, followed by 3 washes for 10 min in PBS. Prior to electrophoresis, slides were equilibrated for 20 min in electrophoresis buffer. Electrophoresis was conducted in alkaline (0.3 M NaOH, 1 mM Na<sub>2</sub>EDTA, pH 13) or neutral electrophoresis buffer (0.5 x TBE) at 1 V/cm and 500 mA for 25 min. Antifade with Sybr Gold (20 mM DABCO, 0.1  $\mu$ l/ml Sybr Gold, 20 mM Tris-HCl, 80% glycerol; 200  $\mu$ l) was added to each slide and covered with cover slips. Microscopy was carried out at 10-fold magnification. Images were captured using constant exposure times and 30 to 70 cells per slide were analyzed using CASP (CASPLab). The fluorescence intensity of the comet tail relative to the head reflects the number of DNA breaks. The Olive tail moment is defined as the product of the tail length and the fraction of total DNA in the tail.

**RNA sequencing.** For RNA sequencing mRNA was enriched from 2 µg total RNA using magnetic poly-dT bead based separation (Illumina). Strand-specific RNA sequencing libraries were prepared using the TruSeq Stranded mRNA Sample Prep Kit (Illumina). Libraries were checked for integrity by capillary electrophoresis (Fragment Analyzer) and quantified by qPCR using the KAPA Library Quantification Kit (KAPA Biosystems). Equimolar amounts of barcoded libraries were pooled and sequenced using the HiSeq 2000 system (Illumina). On average 41 million 75 bp single end reads were generated for each sample with an average mappability of 90%. For data analyses a splice junction library with a length of 120 nucleotides (60+60) per splice junction was created based on known exon-exon junctions according to the Ensembl Genes annotation (v. 67, May 2012). Alignment of the reads to the hg19 transcriptome was performed with pBWA (7). A counts-per-gene table was created based on the overlap of the uniquely mapped reads with the Ensembl Genes annotation for hg19, using BEDtools (v. 2.11) (8). RPKM (reads per kilobase per million reads) values were calculated based on the raw read counts and used as a measure of absolute expression levels. Differential gene expression analysis based on the negative binomial distribution was carried out with DESeq R (v.1.10.1) (9). Pathway analysis was performed using Ingenuity Pathway Analysis (QIAGEN). RNA sequencing data were deposited in the NCBI-GEO database.

## Supplemental References

1. Purcell,S., Neale,B., Todd-Brown,K., Thomas,L., Ferreira,M.A., Bender,D., Maller,J., Sklar,P., de Bakker,P.I., Daly,M.J. et al 2007. PLINK: a tool set for whole-genome association and population-based linkage analyses. *Am. J. Hum. Genet.* **81**:559-575.
2. Patterson,N., Price,A.L., and Reich,D. 2006. Population structure and eigenanalysis. *PLoS. Genet.* **2**:e190.
3. Marchini,J., Howie,B., Myers,S., McVean,G., and Donnelly,P. 2007. A new multipoint method for genome-wide association studies by imputation of genotypes. *Nat. Genet.* **39**:906-913.
4. Delaneau,O., Marchini,J., and Zagury,J.F. 2012. A linear complexity phasing method for thousands of genomes. *Nat. Methods* **9**:179-181.
5. Sul,J.H., Han,B., He,D., and Eskin,E. 2011. An optimal weighted aggregated association test for identification of rare variants involved in common diseases. *Genetics* **188**:181-188.
6. Olive,P.L., and Banath,J.P. 2006. The comet assay: a method to measure DNA damage in individual cells. *Nat. Protoc.* **1**:23-29.
7. Li,H., and Durbin,R. 2009. Fast and accurate short read alignment with Burrows-Wheeler transform. *Bioinformatics.* **25**:1754-1760.
8. Quinlan,A.R., and Hall,I.M. 2010. BEDTools: a flexible suite of utilities for comparing genomic features. *Bioinformatics.* **26**:841-842.
9. Anders,S., and Huber,W. 2010. Differential expression analysis for sequence count data. *Genome Biol.* **11**:R106.
10. Ramantani,G., Kohlhase,J., Hertzberg,C., Innes,A.M., Engel,K., Hunger,S., Borozdin,W., Mah,J.K., Ungerath,K., Walkenhorst,H. et al 2010. Expanding the phenotypic spectrum of lupus erythematosus in Aicardi-Goutieres syndrome. *Arthritis Rheum.* **62**:1469-1477.
11. Sparks,J.L., Chon,H., Cerritelli,S.M., Kunkel,T.A., Johansson,E., Crouch,R.J., and Burgers,P.M. 2012. RNase H2-initiated ribonucleotide excision repair. *Mol. Cell* **47**:980-986.
12. Brzostek-Racine,S., Gordon,C., Van,S.S., and Reich,N.C. 2011. The DNA damage response induces IFN. *J. Immunol.* **187**:5336-5345.
13. Munoz-Fontela,C., Macip,S., Martinez-Sobrido,L., Brown,L., Ashour,J., Garcia-Sastre,A., Lee,S.W., and Aaronson,S.A. 2008. Transcriptional role of p53 in interferon-mediated antiviral immunity. *J. Exp. Med.* **205**:1929-1938.
14. Hasan,M., Koch,J., Rakheja,D., Pattnaik,A.K., Brugarolas,J., Dozmorov,I., Levine,B., Wakeland,E.K., Lee-Kirsch,M.A., and Yan,N. 2013. Trex1 regulates lysosomal biogenesis and interferon-independent activation of antiviral genes. *Nat. Immunol.* **14**:61-71.

**Supplemental Table 1. Serologic findings in Aicardi-Goutières syndrome patients carrying mutations in *TREX1*, *RNASEH2A*, *RNASEH2B*, *RNASEH2C* or *SAMHD1* and their heterozygous parents.** ANA: antinuclear antibodies; other autoantibodies: ss/dsDNA: single-stranded/double-stranded DNA; C3d-CIC, C1q-CIC: C3d/C1q circulating immune complexes; ENA: extractable nuclear antigens; C3/C4: complement C3/C4; ribP: ribosomal phosphoprotein; neg. serol.: negative serology. Normal values are indicated in square brackets. Clinical symptoms associated with autoimmune disease in AGS parents are given in round brackets. All AGS patients presented with signs of a leukoencephalopathy, intracranial calcification, absence of findings of common prenatal infections, and/or a cerebral spinal fluid (CSF) white cell count of >5 white cells/mm<sup>3</sup> or raised levels of IFN $\alpha$  (>2 IU/l) in the CSF. #: Detailed clinical findings of these AGS patients have previously been described (10).

| Patient Genotype                              | Patient Serology                                                                                                                                                                                       | Mother genotype    | Mother Serology                                                                                             | Father genotype    | Father Serology                                                                                                |
|-----------------------------------------------|--------------------------------------------------------------------------------------------------------------------------------------------------------------------------------------------------------|--------------------|-------------------------------------------------------------------------------------------------------------|--------------------|----------------------------------------------------------------------------------------------------------------|
| <i>TREX1</i><br>R114H hom                     | 19 years<br>ANA 1:1280 homogeneous/fine granular<br>anti-nucleosome 138.36 U/ml [<30]<br>anti-ssDNA 20.2 U/ml [<20]<br>cardiolipin-IgG 15.5 U/ml [<10]<br>C3d-CIC 49.24 $\mu$ g/ml [<40]               | R114H het          | 55 years<br>ANA 1:2560 homogeneous/fine granular<br>(arthralgia)                                            | R114H het          | 50 years<br>ANA 1:640 homogeneous/fine granular                                                                |
| <i>TREX1</i><br>R114H hom                     | 15 years<br>anti-ssDNA 21.5 U/ml [<20]<br>cardiolipin-IgG 15.97 U/ml [<10]<br>C1q-CIC 65.49 $\mu$ g/ml [<55]<br>C3d-CIC 95.96 $\mu$ g/ml [<40]                                                         |                    |                                                                                                             |                    |                                                                                                                |
| <i>TREX1</i> <sup>#</sup><br>R114H + P212fs   | 2 years<br>neg. serol.                                                                                                                                                                                 | R114H het          | 25 years<br>neg. serol.                                                                                     | P212fs het         | 29 years<br>anti-C1q 28.47 U/ml [<20]                                                                          |
| <i>TREX1</i> <sup>#</sup><br>E198K hom        | 19 years<br>ANA 1:1280 granular<br>ENA positive                                                                                                                                                        | E198K het          | 43 years<br>C4 0.14 g/l [0.16-0.32]<br>(arthralgia, photosensitivity, alopecia, depression)                 | E198K het          | 44 years<br>ANA 1:160 homogeneous/fine granular                                                                |
| <i>TREX1</i><br>V201D hom                     | 10 years<br>ANA 1:160 fine granular<br>ENA positive<br>cardiolipin-IgG 41.51 U/ml [<10]<br>anti-dsDNA 77.62 IU/ml [<30]                                                                                | V201D het          | 33 years<br>ANA 1:160 fine granular                                                                         | V201D het          | 36 years<br>ANA 1:80 fine granular                                                                             |
| <i>RNASEH2A</i> <sup>#</sup><br>R186W hom     | 2 years<br>neg. serol.                                                                                                                                                                                 | R186W het          | 34 years<br>ANA 1:320 homogeneous/fine granular                                                             | R186W het          | 45 years<br>neg. serol.                                                                                        |
| <i>RNASEH2B</i> <sup>#</sup><br>A177T hom     | 1 year<br>cardiolipin-IgM 19.23 U/ml [<10]                                                                                                                                                             | A177T het          | 24 years<br>cardiolipin-IgM 19.48 U/ml [<10]                                                                | A177T het          | 25 years<br>neg. serol.                                                                                        |
| <i>RNASEH2B</i><br>A177T hom                  | 1 year<br>cardiolipin-IgG 15.4 U/ml [<10]                                                                                                                                                              | A177T het          | 35 years<br>ANA 1:160 fine granular                                                                         | A177T het          | 35 years<br>neg. serol.                                                                                        |
| <i>RNASEH2B</i><br>A177T +<br>c.136+1delG     | 6 years<br>not available                                                                                                                                                                               | c.136+1delG<br>het | 43 years<br>C4 0.11 g/l [0.16-0.32]<br>C3d-CIC 42.7 $\mu$ g/ml [<40]<br>(arthralgia, oral ulcers, dry eyes) | A177T het          | 48 years<br>neg. serol.                                                                                        |
| <i>RNASEH2B</i><br>c.136+1delG het            | 4 years<br>neg. serol.                                                                                                                                                                                 | No mutation        | 29 years<br>neg. serol.                                                                                     | c.136+1delG<br>het | 29 years<br>ANA 1:160 fine granular<br>(recurrent oral ulcers)                                                 |
| <i>RNASEH2C</i> <sup>#</sup><br>D39Y + D115fs | 4 years<br>anti-ssDNA 46.42 U/ml [<20]                                                                                                                                                                 | D39Y het           | 35 years<br>anti-ssDNA 44.49 U/ml [<20]                                                                     | D115fs het         | 42 years<br>rheumatic factor 16.2 IU/ml [<10]<br>anti-ssDNA 32.02 U/ml [<20]<br>C3d-CIC 46.13 $\mu$ g/ml [<40] |
| <i>RNASEH2C</i> <sup>#</sup><br>R69W hom      | 4 years<br>C3 0.79 g/l [0.84-1.67]                                                                                                                                                                     | R69W het           | 28 years<br>ANA 1:80 fine granular                                                                          | R69W het           | 31 years<br>neg. serol.                                                                                        |
| <i>RNASEH2C</i><br>P76L hom                   | 12 years<br>ANA 1:160 fine granular<br>cardiolipin-IgG 16.2 U/ml [<10]<br>anti-dsDNA 33.14 IU/ml [<30]<br>anti-ssDNA 21.8 U/ml [<20]<br>anti-nucleosome 69.27 U/ml [<30]<br>anti-ribP 21.39 U/ml [<10] | P76L het           | 37 years<br>unremarkable<br>(arthralgia, photosensitivity, hypothyroidism)                                  | P76L het           | 39 years<br>ANA 1:160 fine granular<br>anti-ssDNA 42.3 U/ml [<20]                                              |
| <i>RNASEH2C</i><br>K90del het                 | 1 year<br>C1q-CIC 75.54 $\mu$ g/ml [<55]                                                                                                                                                               | K90del het         | 32 years<br>ANA 1:320 homogeneous/fine granular                                                             | No mutation        | 28 years<br>neg. serol.                                                                                        |
| <i>SAMHD1</i> <sup>#</sup><br>H167Y hom       | 9 months<br>neg. serol.                                                                                                                                                                                | H167Y het          | 28 years<br>cytoplasmic antigens 1:320 fine granular<br>[<1:80]                                             | H167Y het          | 29 years<br>ANA 1:160 homogenous/fine granular<br>anti-C1q 32.4 U/ml [<20]                                     |

**Supplemental Table 2. Phenotypic data of SLE patients with rare RNase H2 variants.**

<sup>1</sup>: The 20 year old son of this patient carries the same mutation and was found to have ANA, lymphopenia, reduced C3 complement, vitiligo and cold sensitivity with livoid discoloration of the fingers. Raynaud, Raynaud's syndrome; Sjögren, secondary Sjögren's syndrome.

| Patient | RNase H2 subunit | Nucleotide change       | Amino acid change  | sex | phenotype                                                                                                                                               |
|---------|------------------|-------------------------|--------------------|-----|---------------------------------------------------------------------------------------------------------------------------------------------------------|
| 1       | A                | c.223G>C + c.880G>A     | E75Q + E294K       | M   | Malar rash, photosensitivity, arthritis, ANA, anti-Ro, lymphopenia, Sjögren                                                                             |
| 2       | A                | c.361G>A                | A121T              | F   | Subacute cutaneous lupus, photosensitivity, ANA, anti-Ro, anti-La                                                                                       |
| 3       | A                | c.533C>T                | A178V              | F   | Malar rash, arthritis, ANA, anti-dsDNA, anti-Ro, anti-La, Sjögren, hypothyroidism                                                                       |
| 4       | A                | c.662A>G                | K221R              | F   | Malar rash, discoid rash, arthritis, anti-C1q, anti-cardiolipin-IgM, diffuse alopecia                                                                   |
| 5       | A                | c.662A>G                | K221R              | M   | Raynaud, arthritis, anti-phospholipid syndrome, anti-cardiolipin-IgG, reduced C3                                                                        |
| 6       | A                | c.730A>G                | I244V              | F   | Malar rash, photosensitivity, arthritis, ANA                                                                                                            |
| 7       | B                | c.314A>C                | D105A              | M   | Subacute cutaneous lupus, photosensitivity, ANA, anti-Ro, anti-La, anti-Sm, low complement, lymphopenia, proteinuria, erythema multiforme               |
| 8       | B                | c.28G>A                 | G10R               | F   | Malar rash, discoid rash, arthritis, ANA, reduced C3                                                                                                    |
| 9       | B                | c.285T>G                | F95L               | F   | Malar rash, arthritis, ANA, anti-dsDNA                                                                                                                  |
| 10      | B                | c.529G>A                | A177T              | F   | Malar rash, arthritis, ANA, anti-dsDNA, epilepsy                                                                                                        |
| 11      | B                | c.529G>A                | A177T              | F   | Malar rash, photosensitivity, arthritis, ANA                                                                                                            |
| 12      | B                | c.697A>C                | K233Q              | F   | Malar rash, lupus rash, photosensitivity, ANA, anti-Ro, arthritis, 1 late abortion, 2 small-for-date babies, autoimmune thyroiditis                     |
| 13      | B                | c.744A>C                | K248N              | F   | Malar rash, arthritis, ANA, anti-dsDNA, autoimmune hepatitis, autoimmune thyroiditis, pernicious anemia                                                 |
| 14      | B                | c.859G>T                | A287S              | F   | Discoid rash, photosensitivity, Raynaud, ANA, anti-dsDNA, reduced C3, lymphopenia                                                                       |
| 15      | B                | c.859G>T                | A287S              | F   | Malar rash, photosensitivity, arthritis, ANA, anti-dsDNA, urticarial vasculitis                                                                         |
| 16      | B                | c.859G>T                | A287S              | F   | ANA, anti-dsDNA, anti-Ro, anti-La, pleuritis, glomerulonephritis, hemolytic anemia, Sjögren                                                             |
| 17      | B                | c.859G>T                | A287S              | F   | Malar rash, arthritis, ANA, anti-dsDNA, anti-cardiolipin                                                                                                |
| 18      | C                | c.268_270delAAG         | K90del             | F   | Photosensitivity, Raynaud, arthritis, anti-cardiolipin-IgG, Sjögren                                                                                     |
| 19      | C                | c.328_329delGAinsCC     | E110P              | F   | Malar rash, arthritis, glomerulonephritis, ANA, anti-dsDNA, anti-U1snRNP, lymphopenia                                                                   |
| 20      | C                | c.348+1G>A <sup>1</sup> | splice site F116fs | F   | Malar rash, lupus rash, chilblain lupus, photosensitivity, arthritis, ANA, anti-dsDNA, lymphopenia, episodes of fever, autoimmune thyroiditis, alopecia |
| 21      | C                | c.468G>T                | A156A splice site  | F   | Discoid rash, photosensitivity, Raynaud, serositis, ANA, anti-snRNP, anti-Ro, anti-phospholipid-IgG, anti-phospholipid-IgM, Sjögren                     |



**Supplemental Table 3. Functional consequences of RNase H2 sequence variants.**

Experimentally determined effects on recombinant enzyme activity, complex stability and nuclear localization are indicated, and the predicted overall functional impairment *in vivo* summarized in the final column. Mutations found in SLE patients only are shown in red; mutations found in both controls and patients in orange; mutations found in controls only in black. For weighted burden analysis by logistic regression functional impairment of each variant was classed as neutral (-), mild (● or ●●) or severe (●●● or ●●●●). n.d. = not done.

|          | Reduced enzyme activity <sup>1</sup> | Reduced complex stability <sup>2</sup> | Reduced nuclear localization <sup>3</sup> | Functional impairment <sup>4</sup> |      |
|----------|--------------------------------------|----------------------------------------|-------------------------------------------|------------------------------------|------|
| RNASEH2A | E75Q + E294K                         | ●●                                     | ●●                                        | -                                  | ●●   |
|          | E84D                                 | -                                      | ●●                                        | -                                  | ●●   |
|          | A121T                                | -                                      | -                                         | n.d.                               | -    |
|          | K165R                                | -                                      | ●●                                        | -                                  | ●●   |
|          | A178V                                | ●●●●                                   | ●●                                        | -                                  | ●●●● |
|          | L202S                                | ●●                                     | -                                         | -                                  | ●●   |
|          | L202S + D205E                        | ●●                                     | -                                         | -                                  | ●●   |
|          | K221R                                | ●                                      | ●                                         | -                                  | ●    |
|          | R239C                                | ●●●●                                   | -                                         | -                                  | ●●●● |
|          | I244V                                | ●●●                                    | ●                                         | -                                  | ●●●  |
|          | G276R                                | ●●                                     | ●                                         | -                                  | ●●   |
|          | T297A                                | ●●                                     | ●●                                        | -                                  | ●●   |
| RNASEH2B | G10R                                 | ●●●                                    | ●●                                        | -                                  | ●●●  |
|          | F95L                                 | ●●●                                    | ●●●●                                      | ●                                  | ●●●● |
|          | D105A                                | ●●●●                                   | ●●                                        | -                                  | ●●●● |
|          | N152S                                | ●●●                                    | ●●                                        | -                                  | ●●●  |
|          | A177T                                | -                                      | ●●●                                       | -                                  | ●●●  |
|          | K233Q                                | ●●●●                                   | ●●                                        | -                                  | ●●●● |
|          | K248N                                | ●●●●                                   | ●●                                        | ●●●●                               | ●●●● |
|          | S277N                                | ●●●                                    | ●●                                        | -                                  | ●●●  |
| A287S    | ●●●●                                 | ●                                      | ●                                         | ●●●●                               |      |
| RNASEH2C | E110P                                | -                                      | ●                                         | -                                  | ●    |
|          | K90del                               | -                                      | ●                                         | -                                  | ●    |
|          | c.348+1G>A                           | ●●●●                                   | no complex formed                         | ●●●                                | ●●●● |
|          | A156A <sup>5</sup>                   | n.d.                                   | n.d.                                      | n.d.                               | ●●●● |

<sup>1</sup> Effect on *in vitro* RNase H2 enzyme activity: ● very weak effect (< 80% of wild type, not significant); ●● weak effect (< 75% of wild type,  $P < 0.01$ ); ●●● moderate effect (< 50% of wild type,  $P < 0.01$ ); ●●●● strong effect (< 25% of wild type,  $P < 0.001$ ).

<sup>2</sup> Effect on complex stability measured as a reduction in ThermoFluor melting temperature ( $T_m$ ) of the protein complex compared to wild type: ● very weak effect (0.3-0.5 °C reduction in  $T_m$ ,  $P < 0.001$ ), ●● weak effect (< 2 °C reduction in  $T_m$ ,  $P < 0.001$ ), ●●● moderate effect (2-5 °C reduction in  $T_m$ ,  $P < 0.001$ ), ●●●● strong effect (> 5 °C reduction in  $T_m$ ,  $P < 0.001$ ).

<sup>3</sup> Effect on nuclear localization: ● weak effect (extranuclear localization of RNASEH2A and C in 10-20% of cells,  $P < 0.05$ ); ●●● strong effect (extranuclear localization of RNASEH2A and C in 80-100% of cells,  $P < 0.001$ ); ●●●● very strong effect (complete absence of nuclear localization,  $P < 0.001$ ).

<sup>4</sup> This prediction is based on aggregating *in vitro* enzymatic and protein stability data with subcellular localization studies, with the strongest effect in the three categories taken to predict the severity of the mutation on *in vivo* function.

<sup>5</sup> The RNASEH2C-A156A mutation like the c.348+1G>A mutation disrupts an essential splice site, and therefore a strong effect on functional impairment is inferred.

**Supplemental Table 4. Results of the aggregated tests for rare and low frequency variants.** Statistical analysis was run for each RNase H2 subunit separately (A, B and C) and for the 3 subunits together (ABC) as part of a single biochemical unit using the rare variant weighted aggregate statistic (RWAS). A set of MAF thresholds in descending order was applied to analyze the effect of rare and low frequency variants on aggregated association. Corrected *P* values were obtained by applying 10,000 permutations.

| subunit | MAF threshold | Info value $\geq 0.8$ |          |                    | Info value $\geq 0.8$ and $r^2 < 0.5$ |          |                    |
|---------|---------------|-----------------------|----------|--------------------|---------------------------------------|----------|--------------------|
|         |               | number of markers     | <i>P</i> | <i>P</i> corrected | number of markers                     | <i>P</i> | <i>P</i> corrected |
| A       | no            | 173                   | 0.000000 | 0.000700           | 27                                    | 0.005911 | 0.016598           |
|         | 0.05          | 153                   | 0.000000 | 0.000800           | 23                                    | 0.005911 | 0.016598           |
|         | 0.01          | 22                    | 0.000043 | 0.005999           | 12                                    | 0.012787 | 0.032497           |
|         | 0.005         | 15                    | 0.000132 | 0.007299           | 9                                     | 0.016093 | 0.037696           |
|         | 0.001         | 9                     | 0.000128 | 0.007799           | 5                                     | 0.011094 | 0.025697           |
| B       | no            | 314                   | 0.000000 | 0.023198           | 55                                    | 0.015208 | 0.027497           |
|         | 0.05          | 127                   | 0.000000 | 0.038596           | 34                                    | 0.016463 | 0.029997           |
|         | 0.01          | 71                    | 0.000000 | 0.023598           | 18                                    | 0.003728 | 0.007899           |
|         | 0.005         | 52                    | 0.000000 | 0.006699           | 15                                    | 0.003599 | 0.006199           |
|         | 0.001         | 40                    | 0.000000 | 0.005599           | 6                                     | 0.000747 | 0.000900           |
| C       | no            | 614                   | 0.000000 | 0.009299           | 96                                    | 0.000988 | 0.034197           |
|         | 0.05          | 244                   | 0.000000 | 0.007599           | 64                                    | 0.000042 | 0.025497           |
|         | 0.01          | 232                   | 0.000000 | 0.007099           | 57                                    | 0.000670 | 0.030597           |
|         | 0.005         | 226                   | 0.000000 | 0.005599           | 51                                    | 0.001269 | 0.036896           |
|         | 0.001         | 146                   | 0.000000 | 0.007599           | 25                                    | 0.001347 | 0.022298           |
| ABC     | no            | 1101                  | 0.000000 | 0.000200           | 178                                   | 0.000001 | 0.001100           |
|         | 0.05          | 524                   | 0.000000 | 0.000300           | 121                                   | 0.000001 | 0.000400           |
|         | 0.01          | 326                   | 0.000000 | 0.000800           | 88                                    | 0.000000 | 0.000500           |
|         | 0.005         | 293                   | 0.000000 | 0.000500           | 75                                    | 0.000002 | 0.000700           |
|         | 0.001         | 195                   | 0.000000 | 0.000400           | 36                                    | 0.000001 | 0.000200           |

**Supplemental Table 5. Primer sequences for mutation analysis of RNase H2 genes.**

| <b>Gene</b>     | <b>Name</b>                   | <b>Sequence (5'-3')</b>        |
|-----------------|-------------------------------|--------------------------------|
| <i>RNASEH2A</i> | RN2A-1F                       | GACCCGTCCTGCAGTATTA            |
|                 | RN2A-1R                       | GAGGTTTGGAGACAGCACATC          |
|                 | RN2A-2F                       | GGAAGGGATTCTGGGTATG            |
|                 | RN2A-2R                       | TCATGGCTCACTGCAGTCTC           |
|                 | RN2A-3F                       | CGTGCTGGAGAAGAGGATTC           |
|                 | RN2A-3R                       | CCCTGGCCATTTCAACATTA           |
|                 | RN2A-4F                       | GGCAGGGAGCTTGAATGTTA           |
|                 | RN2A-4R                       | CACTCCCACCTTGCTTCTGT           |
| <i>RNASEH2B</i> | Dleu8-1bF                     | CCACCCGGAACAGACCCTTCT          |
|                 | Dleu8-1bR                     | GGCCAGCTGTCCCAGAGAGAATC        |
|                 | Dleu8-2F                      | AAGTAGAAGAAAGGAAAACAGG         |
|                 | Dleu8-2R                      | AGCTATTCAGAAAGAGCAAGG          |
|                 | Dleu8-3F                      | ATTCCCTCTTGATCTGATGGAGGATTTA   |
|                 | Dleu8-3bR                     | AACCCGGTGACAGACCCACAAC         |
|                 | Dleu8-4F                      | TGTTTTTCACTTTGAGATTAAGG        |
|                 | Dleu8-4R                      | GATCATTAAAAGGAGAGAGAGG         |
|                 | Dleu8-5F                      | CCCAGCCATGAGTTAATGTG           |
|                 | Dleu8-5R                      | ACATTCAGTGTGTCTGTAAGC          |
|                 | Dleu8-6F                      | GTTGATGACTCCTGAGGTAGCCACAT     |
|                 | Dleu8-6cR                     | CAAAGCCTTCTTCTCATACTTGGTATCTCT |
|                 | Dleu8-7F                      | TAAATGGTCTGAAGGCCACC           |
|                 | Dleu8-7R                      | ATGAGGCTTCTGTGATATTAAG         |
|                 | Dleu8-8F                      | GGGTCAGAATTTGAATTCAGG          |
|                 | Dleu8-8R                      | TCATAAACAGTGATATGATAAGC        |
|                 | Dleu8-9F                      | GAAAAGTAGGACTTACTAAGTC         |
|                 | Dleu8-9R                      | ACACCTTAAAATATATTAGAACC        |
|                 | Dleu8-10F                     | GGTCTAAATTATACATGTTGGGT        |
|                 | Dleu8-10R                     | AAACTGTAATCACAATCAAGCGT        |
| Dleu8-11bF      | TAGTGGGGGATGCTTACCTTCCTTAA    |                                |
| Dleu8-11bR      | GTTTAAGAGAACATGAAATTGGCCTCTTC |                                |
| <i>RNASEH2C</i> | AYP1-1F                       | GGAAAGCGTTAGGGGGTAAG           |
|                 | AYP1-1R                       | CTCCTCCTCTTGGTCGTCAG           |
|                 | AYP1-2F                       | TGGGATACGTGATGGTGACA           |
|                 | AYP1-2R                       | GCTCCTTTATTGGGGTGATG           |

**Supplemental Table 6. Primer sequences for RT-PCR.** IFI6 gene expression was determined using a pre-designed TaqMan Gene Expression Assay (Applied Biosystems).

| <b>Target gene</b> | <b>Sequence (5'-3')</b>              |
|--------------------|--------------------------------------|
| IFNB_F             | ACCTCCGAAACTGAAGATCTCCTA             |
| IFNB_R             | TGCTGGTTGAAGAATGCTTGA                |
| IFNB_P             | FAM-CCTGTGCCTCTGGGACTGGACAATTG-TAMRA |
| GAPDH_F            | GAAGGTGAAGGTCGGAGTC                  |
| GAPDH_R            | GAAGATGGTGATGGGATTTC                 |
| GAPDH_P            | FAM-CAAGCTTCCCGTTCTCAGCC-TAMRA       |
| IRF7_F             | TCCCCACGCTATACCATCTACCT              |
| IRF7_R             | ACAGCCAGGGTTCCAGCTT                  |
| IRF7_P             | FAM-AGCTGACAGGTCTGCCCCGAAGCC-TAMRA   |
| HPRT1_F            | TGGAAAGGGTGTTCATTCCTCAT              |
| HPRT1_R            | ATGTAATCCAGCAGGTCAGCAA               |
| IFI27_F            | TGCTCTCACCTCATCAGCAGT                |
| IFI27_R            | CACAACTCCTCCAATCACAACT               |
| IFI44_F            | CTGGGGCTGAGTGAGAAAGA                 |
| IFI44_R            | AGCGATGGGGAATCAATGTA                 |
| IFI44L_F           | ATCACCAGCATAACCGAGCG                 |
| IFI44L_R           | ATCCATGCACAGTCCTGCTC                 |
| ISG15_F            | GAGAGGCAGCGAACTCATCT                 |
| ISG15_R            | CTTCAGCTCTGACACCGACA                 |

**Supplemental Figure 1. Effect of RNase H2 mutations on nuclear localization of the RNase H2 complex.** HeLa cells were transfected with plasmids expressing each of the three subunits tagged at the N-terminus with YFP (RNASEH2A), CFP (RNASEH2B) or mCherry (RNASEH2C). The wild type heterotrimeric RNase H2 complex resides within the nucleus. (a-c) Rare variants identified by resequencing in each of the three subunits were expressed together with the two wild type subunits, and nuclear localization of each individual subunit was determined by examining  $\geq 300$  cells per mutation from three independent experiments. Shown are the means and SEM. \* $P < 0.05$ ; \*\* $P < 0.01$ ; \*\*\* $P < 0.001$  versus wild type by Fisher's exact test. (d) Immunofluorescence images show reduced nuclear localization of RNase H2 for mutations in *RNASEH2B* (B-F95L, B-K248N, B-A287S) and *RNASEH2C* (C-F116fs, resulting from the c.358+1G>A mutation).

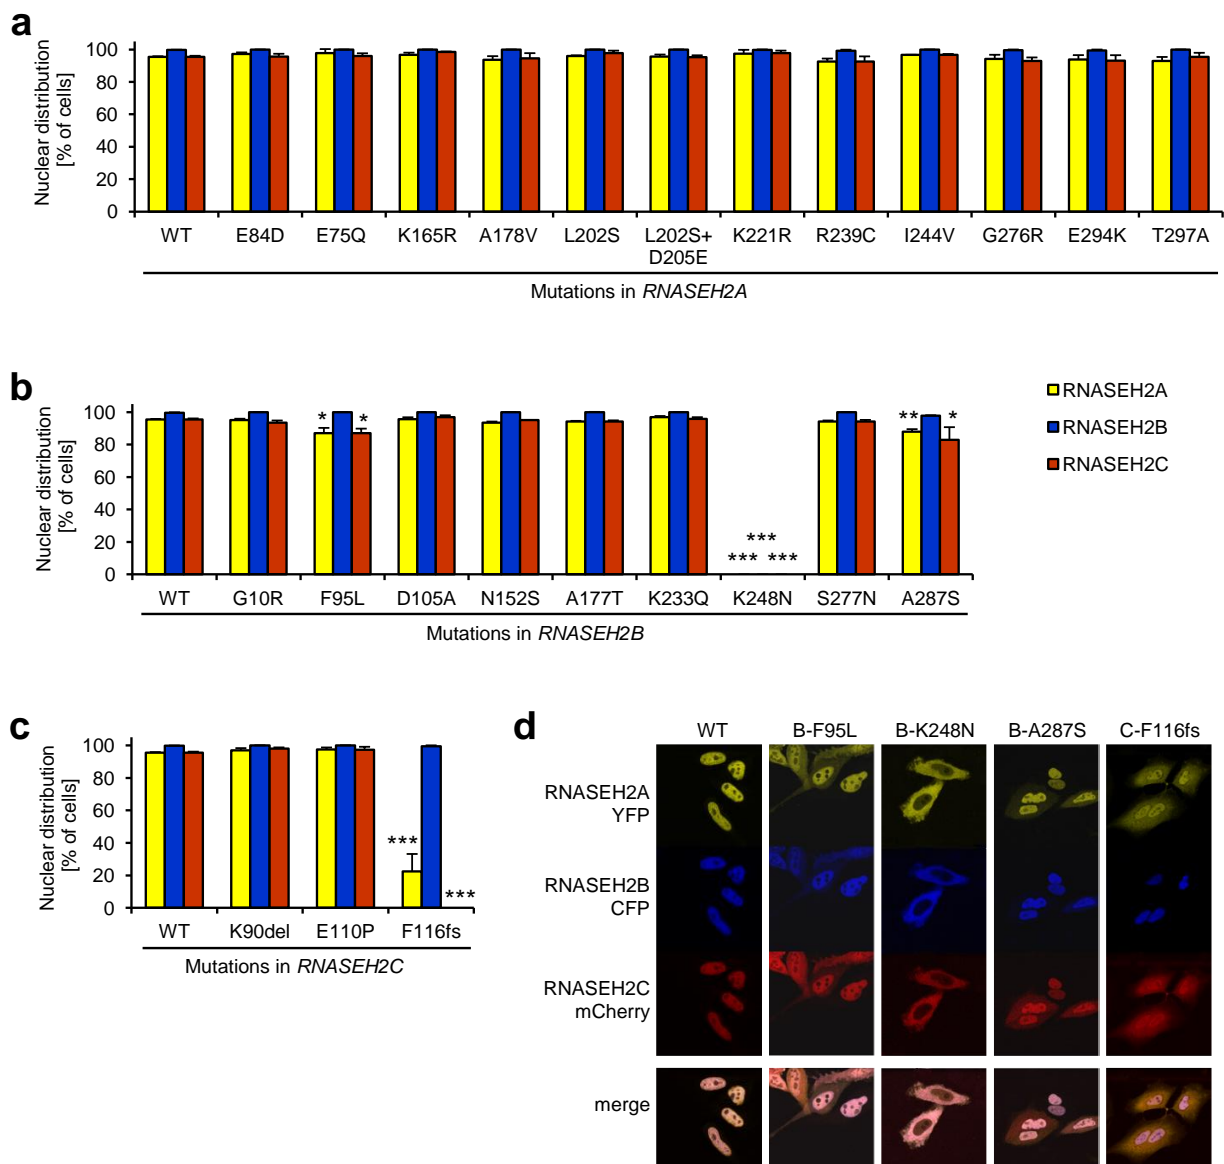

**Supplemental Figure 2. Activation of p53-dependent and interferon-stimulated genes in RNase H2 mutant fibroblasts.** (a) RNA sequencing analysis of fibroblasts from wild type controls (WT, n = 2) and patients with SLE (n = 2) or AGS (n = 2). Heat map represents ~16.000 hierarchically clustered transcripts based on the mean RPKM values of each group. (b) Quantitative real-time RT-PCR of selected ISGs in fibroblasts of SLE and AGS patients compared to 3 wild type cell lines (WT). Error bars represent mean  $\pm$  SEM. \* $P$  < 0.05 versus wild type by Student's  $t$  test.

**a**

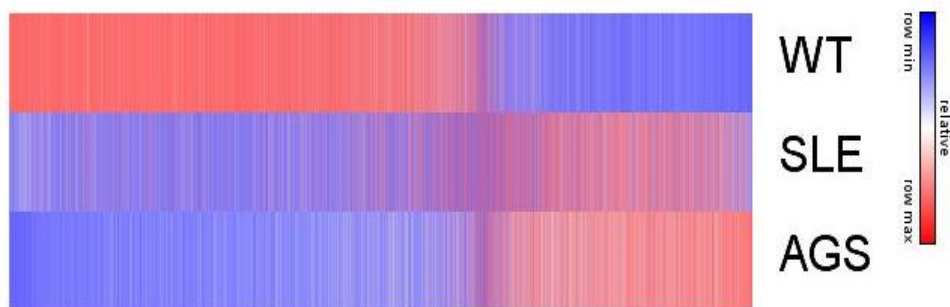

**b**

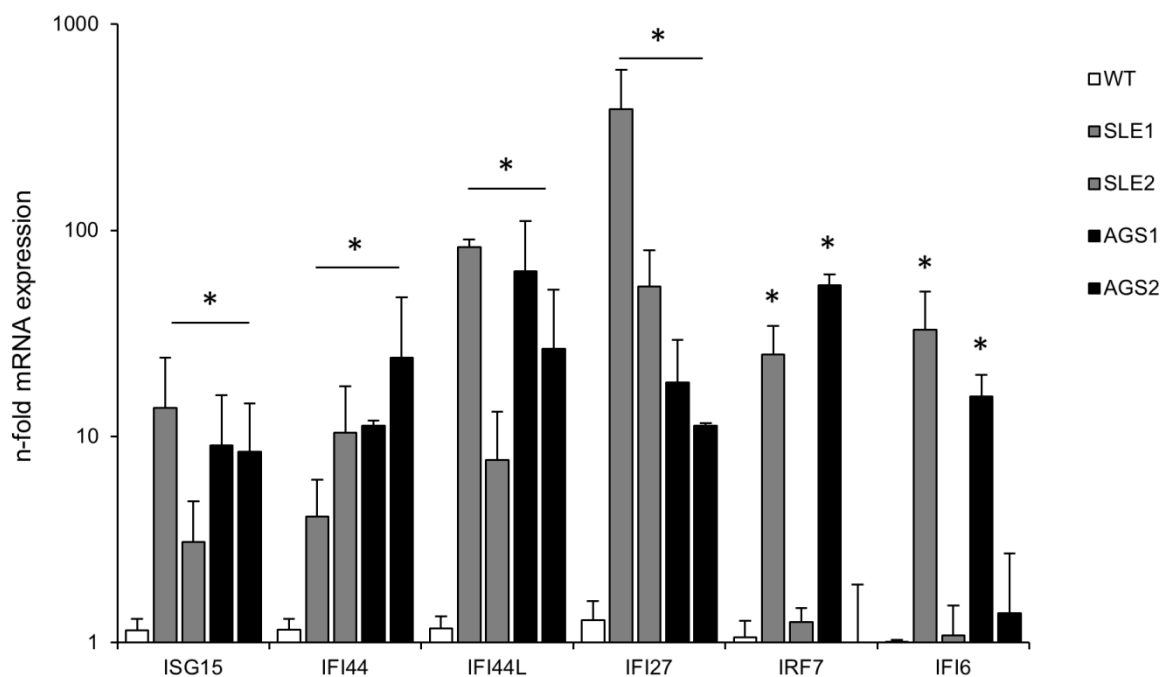

**Supplemental Figure 3. Activation of DNA damage signaling in RNase H2-deficient fibroblasts.** Differentially expressed genes obtained by RNA sequencing of patient fibroblasts (**a**, SLE; **b**, AGS) were mapped to the Ingenuity Pathway Analysis knowledge base and molecular networks were created using algorithmically generated pathways. The intensity of the node color indicates the degree of up-regulation (red) or down-regulation (green). Grey nodes indicate neither up- or down-regulated molecules. Mixed colored nodes represent a group of molecules.

**a SLE**

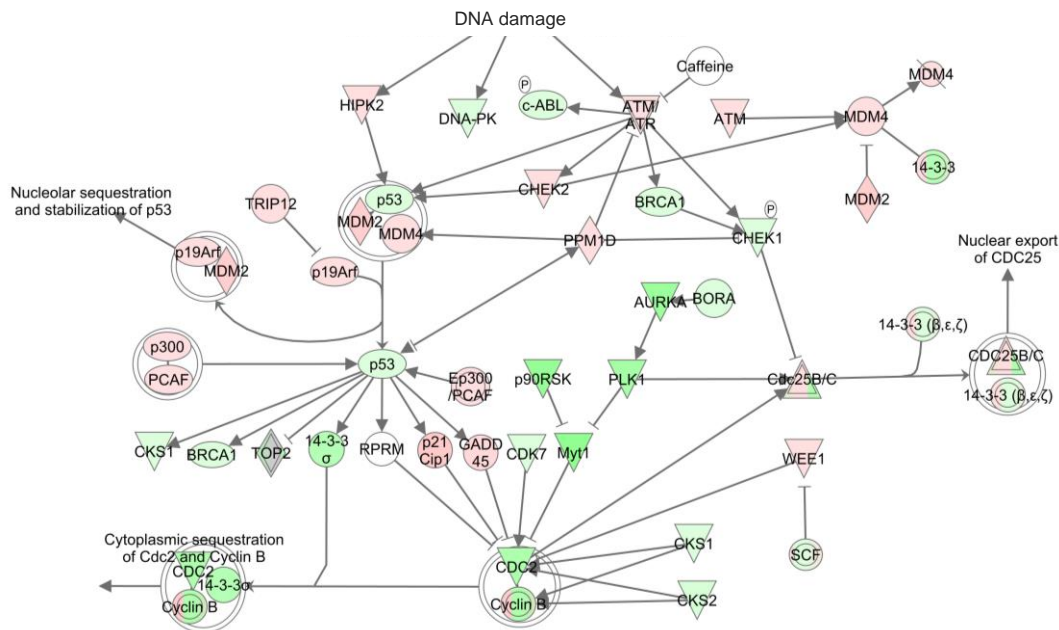

**b AGS**

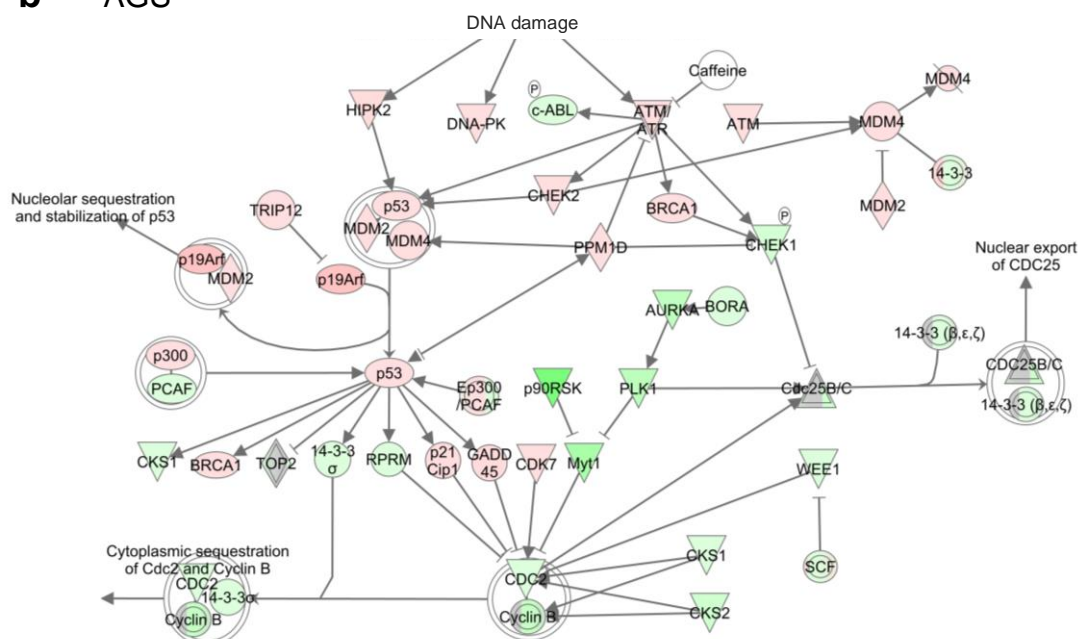

**Supplemental Figure 4. Activation of type I-IFN signaling in RNase H2-deficient fibroblasts.** Differentially expressed genes obtained by RNA sequencing of patient fibroblasts (a, SLE; b, AGS) were mapped to the Ingenuity Pathway Analysis knowledge base and molecular networks were created using algorithmically generated pathways. The intensity of the node color indicates the degree of up-regulation (red) or down-regulation (green). Grey nodes indicate neither up- or down-regulated molecules. Mixed colored nodes represent a group of molecules. Grey nodes indicate neither up- or down-regulated molecules. Mixed colored nodes represent a group of molecules.

### a SLE

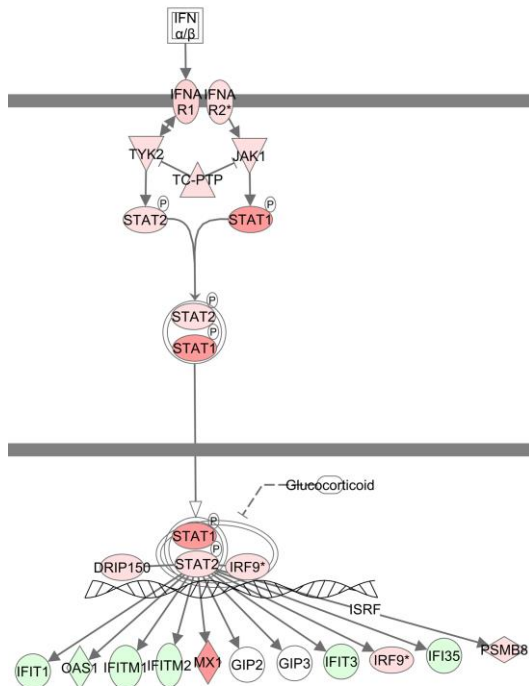

### b AGS

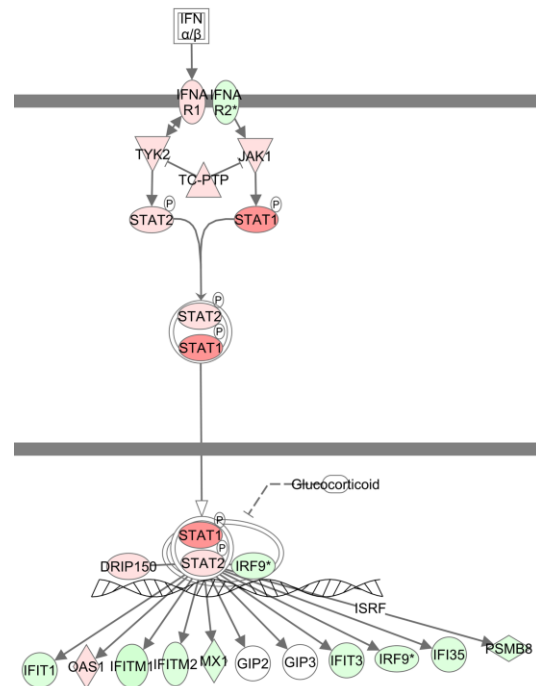



**Supplemental Figure 5. Cutaneous phenotype of SLE patients carrying mutations in *RNASEH2C* (SLE1) and *RNASEH2B* (SLE2).** (a) Patient SLE1 developed cold-induced livoid infiltrates on the dorsal side of her fingers primarily affecting the periungual area. Lesions partially ulcerated and resembled the typical picture of chilblain lupus also seen in patients with AGS. The facial appearance was characterized by erythematous macular exanthema with accentuation of the malar region and the bridge of the nose sparing the nasolabial fold. (b) Patient SLE2 had a history of malar rash and exanthema. After sun exposure she developed plaque-like erythematous infiltrates on her cheeks. These were long lasting and required sun protection and oral treatment with prednisone for healing. (c) A lesional biopsy from the finger of patient SLE1 shows perivascular and periadnexial lymphohistocytic infiltration along with acanthosis of the epidermis. Partially discrete interface dermatitis with alteration of the dermal epidermal junction is seen. (d) Histology of a lesional biopsy taken from the trunk of patient SLE2 shows superficial and deep perivascular as well as periadnexial lymphohistocytic infiltration with localized interphase dermatitis. (scale bar 100µm).

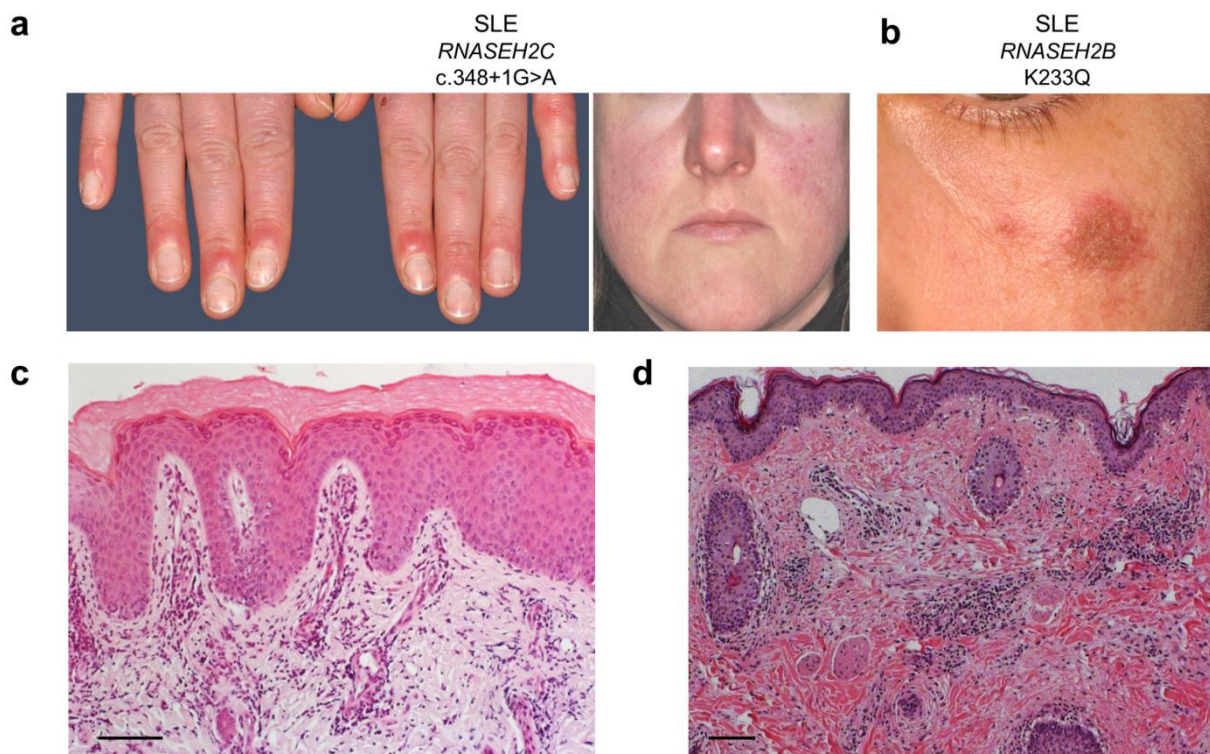

**Supplemental Figure 6. Increased CPD formation in RNase H2-deficient fibroblasts exposed to solar simulated radiation.** CPD formation in patient fibroblasts (SLE1, SLE2, AGS1, AGS2) and wild type cells (WT, n=4) after irradiation with 100 J/m<sup>2</sup> SSR. CPD formation was assessed by flow cytometry analysis immediately after irradiation and following 7 and 24 h of cultivation post-irradiation. Box plots depict the interquartile range (box), mean (square), median (line) and SD (whisker) of at least three independent experiments for each patient and for four independent wild type control cell lines. \* $P < 0.05$ ; \*\* $P < 0.01$ ; \*\*\* $P < 0.001$  versus wild type by  $t$  test.

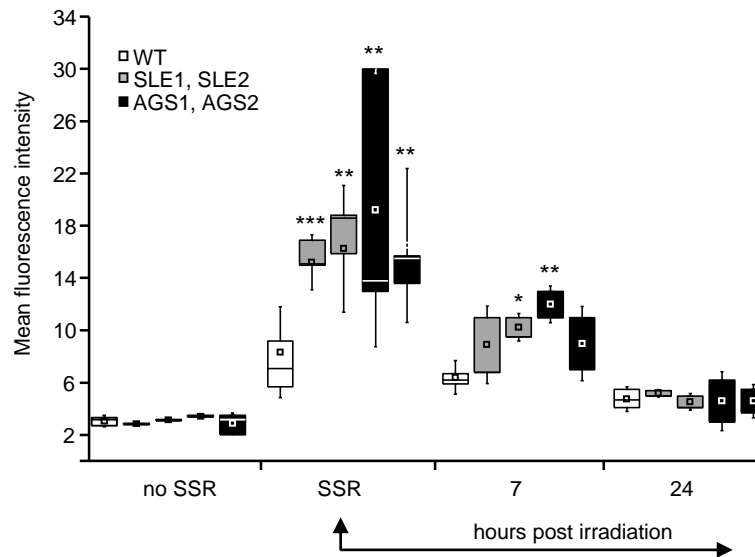

**Supplemental Figure 7. Model linking genomic ribonucleotide incorporation to aberrant type I IFN production and induction of autoimmunity in AGS and SLE.** Our data suggest deficient repair of misincorporated ribonucleotides leads to p53-dependent DNA damage signaling and enhanced cellular senescence. The heterotrimeric RNase H2 complex removes ribonucleotides from DNA by ribonucleotide excision repair (11). If left unrepaired, embedded ribonucleotides (indicated by an R) promote UV light-induced CPD formation (indicated by TT) due to conformational changes in the DNA that favour photocrosslinking, which may further fuel DNA damage signaling. Nucleic acid byproducts of DNA repair may bind and stimulate pattern recognition receptors (PRR), causing activation of innate immune signaling pathways and leading to type I IFN production. Alternatively, DNA damage signaling itself may sensitize cells to interferon-responsive stimuli, e.g. by p53-directed transcriptional upregulation of interferon-regulatory factors or by promoting transactivation of IFN-stimulated genes (ISGs) (12;13). Senescence-associated increased lysosomal activity may also sensitize cells to interferon-responsive stimuli (14). Enhanced type I IFN upregulation may be induced by PRR sensing of nucleic acids from viral infection or circulating nucleic acids released by apoptotic cells. Prolonged and enhanced type I IFN expression will favour the induction of autoimmune disease.

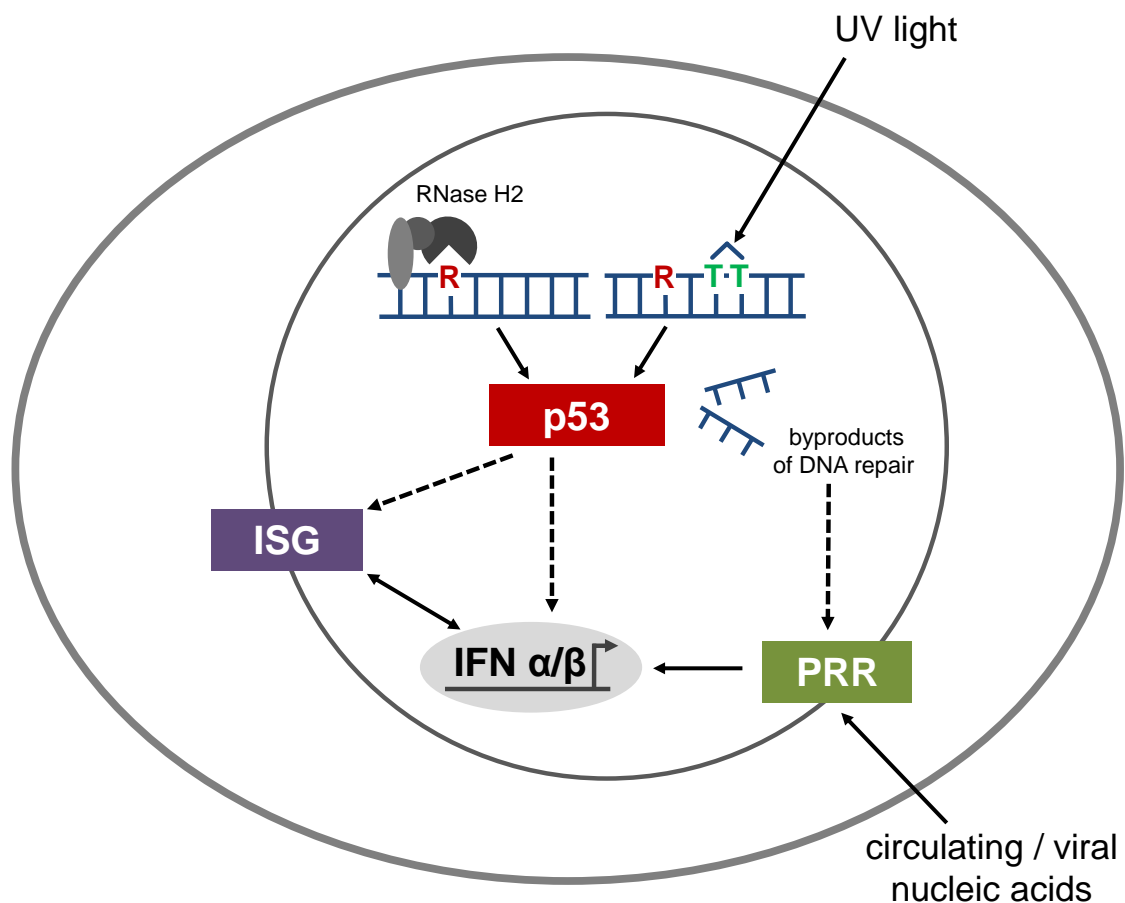

**Supplemental Figure 8. UV-induced apoptosis in RNase H2-deficient fibroblasts.** Patient fibroblasts (SLE1, SLE2, AGS1, AGS2) and wild type cells (WT, n=3) were irradiated with 20 J/m<sup>2</sup> UVC or 100 J/m<sup>2</sup> SSR, respectively. Sub<sub>G1</sub> fractions were determined 72 h post-irradiation by flow cytometry after propidium iodide staining. Shown are the means and SEM of five independent experiments.

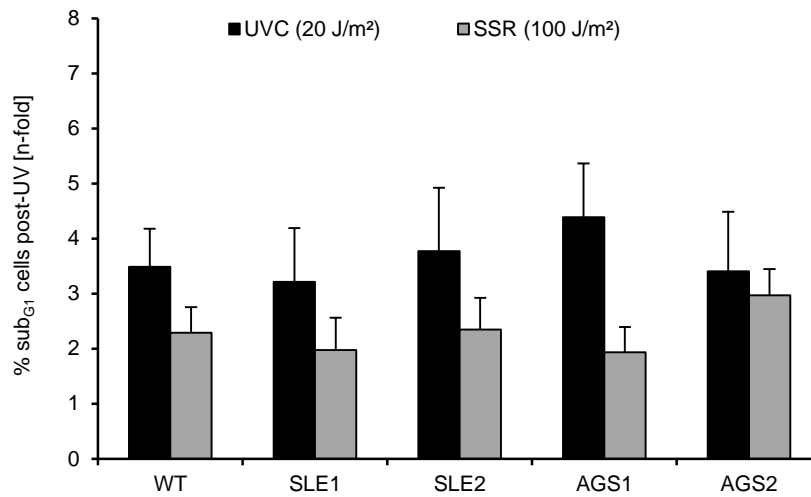

Supplement: JCI78001sd.pdf [file JCI78001sd.pdf]
